# Supplementary material for: Identification of putative biomarkers for prediabetes by metabolome analysis of rat models of type 2 diabetes
Source: PubMed Central journal article supplement (PMC4559098; doi:10.1007/s11306-015-0784-9), 2015-03-12
Supplement: 11306_2015_784_MOESM1_ESM.pdf [file 11306_2015_784_MOESM1_ESM.pdf]

## **Supplementary Materials**

### **Supplementary Table 1**

Contents of metabolites in SDT and SD rats.

### **Supplementary Fig. 1**

Glucose levels measured by GC-MS.

### **Supplementary Fig. 2**

PCA score plots and loading plots of metabolomics data on SDT and SD rats.

### **Supplementary Fig. 3**

Kynurenine/tryptophan ratio.

**Supplementary Table 1** Contents of metabolites in SDT and SD rats (n = 11 each)

| No. | RT     | Metabolite name                 | 6 weeks of age |        |         |        |                           |                |
|-----|--------|---------------------------------|----------------|--------|---------|--------|---------------------------|----------------|
|     |        |                                 | SD rat         |        | SDT rat |        | t-test<br><i>p</i> -value | Fold<br>change |
|     |        |                                 | Mean           | SE     | Mean    | SE     |                           |                |
| 1   | 712.40 | 1,5-Anhydroglucitol             | 0.3524         | 0.0146 | 0.3423  | 0.0077 | 0.5519                    | 0.97           |
| 2   | 759.85 | 1-Hexadecanol                   | 0.0023         | 0.0002 | 0.0024  | 0.0003 | 0.7528                    | 1.05           |
| 3   | 698.10 | 1-Methylhistidine               | 0.0045         | 0.0005 | 0.0047  | 0.0002 | 0.7072                    | 1.04           |
| 4   | 331.20 | 2-Hydroxybutyric acid           | 0.0217         | 0.0032 | 0.0277  | 0.0034 | 0.2098                    | 1.28           |
| 5   | 563.55 | 4-Hydroxyproline                | 0.1215         | 0.0083 | 0.1147  | 0.0069 | 0.5367                    | 0.94           |
| 6   | 727.25 | Allantoin                       | 0.0724         | 0.0050 | 0.0764  | 0.0032 | 0.5075                    | 1.06           |
| 7   | 362.20 | alpha-Aminobutyric acid         | 0.0562         | 0.0052 | 0.0593  | 0.0021 | 0.5873                    | 1.06           |
| 8   | 320.70 | alpha-Ketoisovaleric acid       | 0.0025         | 0.0002 | 0.0025  | 0.0002 | 0.8932                    | 0.99           |
| 9   | 651.00 | Arabitol                        | 0.1145         | 0.0255 | 0.1062  | 0.0232 | 0.8121                    | 0.93           |
| 10  | 632.90 | Asparagine                      | 0.0106         | 0.0007 | 0.0111  | 0.0008 | 0.6451                    | 1.05           |
| 11  | 559.60 | Aspartic acid                   | 0.0090         | 0.0007 | 0.0090  | 0.0012 | 0.9964                    | 1.00           |
| 12  | 422.55 | Caprylic acid                   | 0.0026         | 0.0001 | 0.0032  | 0.0002 | 0.0351                    | 1.22           |
| 13  | 696.70 | Citric acid + Isocitric acid    | 0.6190         | 0.0157 | 0.7135  | 0.0086 | <0.0001                   | 1.15           |
| 14  | 881.45 | Cysteine + Cystine              | 0.0175         | 0.0018 | 0.0113  | 0.0010 | 0.0104                    | 0.65           |
| 15  | 565.65 | Cytosine                        | 0.0025         | 0.0004 | 0.0020  | 0.0003 | 0.3315                    | 0.81           |
| 16  | 860.45 | Elaidic acid                    | 0.0010         | 0.0001 | 0.0015  | 0.0002 | 0.1172                    | 1.47           |
| 17  | 550.25 | Erythritol                      | 0.0047         | 0.0004 | 0.0041  | 0.0001 | 0.1910                    | 0.89           |
| 18  | 721.05 | Fructose                        | 0.0261         | 0.0018 | 0.0312  | 0.0027 | 0.1432                    | 1.19           |
| 19  | 744.25 | Galactosamine                   | 0.0089         | 0.0009 | 0.0078  | 0.0014 | 0.4911                    | 0.87           |
| 20  | 756.45 | Galacturonic acid               | 0.0016         | 0.0002 | 0.0012  | 0.0001 | 0.0331                    | 0.73           |
| 21  | 741.70 | Glucono-1,4-lactone             | 0.0153         | 0.0014 | 0.0203  | 0.0005 | 0.0049                    | 1.33           |
| 22  | 744.75 | Glucuronic acid                 | 0.0012         | 0.0001 | 0.0014  | 0.0001 | 0.0645                    | 1.18           |
| 23  | 608.70 | Glutamic acid                   | 0.1005         | 0.0057 | 0.0972  | 0.0077 | 0.7375                    | 0.97           |
| 24  | 680.05 | Glutamine                       | 0.1593         | 0.0047 | 0.1538  | 0.0067 | 0.5049                    | 0.97           |
| 25  | 456.55 | Glyceric acid                   | 0.0016         | 0.0002 | 0.0021  | 0.0002 | 0.0919                    | 1.33           |
| 26  | 423.20 | Glycerol                        | 0.3349         | 0.0221 | 0.3508  | 0.0245 | 0.6355                    | 1.05           |
| 27  | 446.15 | Glycine                         | 0.4339         | 0.0147 | 0.3706  | 0.0148 | 0.0067                    | 0.85           |
| 28  | 806.95 | Inositol                        | 0.1701         | 0.0091 | 0.2034  | 0.0095 | 0.0207                    | 1.20           |
| 29  | 848.15 | Kynurenine                      | 0.0012         | 0.0001 | 0.0013  | 0.0001 | 0.5552                    | 1.07           |
| 30  | 627.85 | Lauric acid (Dodecanoic acid)   | 0.0038         | 0.0005 | 0.0045  | 0.0005 | 0.2977                    | 1.21           |
| 31  | 741.90 | Lysine                          | 0.9380         | 0.0383 | 1.2895  | 0.0395 | <0.0001                   | 1.37           |
| 32  | 542.75 | Malic acid                      | 0.0027         | 0.0003 | 0.0057  | 0.0004 | <0.0001                   | 2.15           |
| 33  | 723.35 | Mannose                         | 0.2471         | 0.0071 | 0.2096  | 0.0069 | 0.0012                    | 0.85           |
| 34  | 562.75 | Methionine                      | 0.0911         | 0.0049 | 0.0878  | 0.0031 | 0.5678                    | 0.96           |
| 35  | 817.85 | N-alpha-Acetyllysine            | 0.0032         | 0.0009 | 0.0018  | 0.0005 | 0.1678                    | 0.55           |
| 36  | 683.45 | O-Phosphoethanolamine           | 0.0037         | 0.0004 | 0.0042  | 0.0004 | 0.3246                    | 1.15           |
| 37  | 698.25 | Ornithine                       | 0.2305         | 0.0177 | 0.2338  | 0.0078 | 0.8686                    | 1.01           |
| 38  | 335.15 | Oxalic acid                     | 0.0047         | 0.0004 | 0.0065  | 0.0003 | 0.0030                    | 1.38           |
| 39  | 786.65 | Palmitoleic acid                | 0.0036         | 0.0006 | 0.0034  | 0.0006 | 0.8376                    | 0.95           |
| 40  | 616.70 | Phenylalanine                   | 0.0922         | 0.0049 | 0.1079  | 0.0027 | 0.0134                    | 1.17           |
| 41  | 442.55 | Proline                         | 0.0182         | 0.0012 | 0.0165  | 0.0009 | 0.2643                    | 0.91           |
| 42  | 279.25 | Pyruvic acid + Oxaloacetic acid | 0.0318         | 0.0049 | 0.0410  | 0.0069 | 0.2912                    | 1.29           |
| 43  | 656.35 | Rhamnose                        | 0.0012         | 0.0001 | 0.0013  | 0.0002 | 0.4951                    | 1.13           |
| 44  | 653.50 | Ribitol                         | 0.0069         | 0.0015 | 0.0069  | 0.0014 | 0.9898                    | 1.00           |
| 45  | 632.25 | Ribose                          | 0.0054         | 0.0014 | 0.0028  | 0.0003 | 0.0903                    | 0.51           |
| 46  | 632.75 | Ribulose                        | 0.0024         | 0.0004 | 0.0029  | 0.0002 | 0.2436                    | 1.24           |
| 47  | 474.05 | Serine                          | 0.5138         | 0.0299 | 0.4487  | 0.0221 | 0.0967                    | 0.87           |
| 48  | 717.05 | Sorbose                         | 0.0794         | 0.0035 | 0.0934  | 0.0064 | 0.0773                    | 1.18           |
| 49  | 868.55 | Spermidine                      | 0.0013         | 0.0002 | 0.0028  | 0.0005 | 0.0249                    | 2.12           |
| 50  | 450.35 | Succinic acid                   | 0.0159         | 0.0010 | 0.0225  | 0.0006 | <0.0001                   | 1.42           |
| 51  | 715.10 | Tagatose                        | 0.0033         | 0.0006 | 0.0030  | 0.0006 | 0.7096                    | 0.91           |
| 52  | 613.95 | Tartaric acid                   | 0.0009         | 0.0001 | 0.0015  | 0.0001 | 0.0027                    | 1.67           |
| 53  | 635.15 | Taurine                         | 0.0501         | 0.0094 | 0.0522  | 0.0039 | 0.8412                    | 1.04           |
| 54  | 438.90 | Threonine                       | 0.1223         | 0.0100 | 0.0922  | 0.0062 | 0.0211                    | 0.75           |
| 55  | 858.10 | Tryptophan                      | 0.2618         | 0.0189 | 0.2088  | 0.0180 | 0.0563                    | 0.80           |
| 56  | 750.40 | Tyrosine                        | 0.7670         | 0.0321 | 0.8425  | 0.0362 | 0.1362                    | 1.10           |
| 57  | 390.15 | Valine                          | 1.4526         | 0.0904 | 1.2427  | 0.0614 | 0.0715                    | 0.86           |
| 58  | 644.80 | Xylitol                         | 0.0095         | 0.0016 | 0.0075  | 0.0017 | 0.3857                    | 0.78           |
| 59  | 621.70 | Xylose                          | 0.0016         | 0.0002 | 0.0019  | 0.0003 | 0.3473                    | 1.20           |

Content of metabolite was expressed as intensity of each metabolite relative to that of internal standard (2-isopropylmalic acid). Fold change was calculated for each metabolite by dividing the mean value of SDT rat by that of SD rat.

**Supplementary Table 1 (Continued.)** Contents of metabolites in SDT and SD rats (n = 11 each)

| No. | RT     | Metabolite name                 | 8 weeks of age |        |         |        |                           |                |
|-----|--------|---------------------------------|----------------|--------|---------|--------|---------------------------|----------------|
|     |        |                                 | SD rat         |        | SDT rat |        | t-test<br><i>p</i> -value | Fold<br>change |
|     |        |                                 | Mean           | SE     | Mean    | SE     |                           |                |
| 1   | 712.40 | 1,5-Anhydroglucitol             | 0.3093         | 0.0154 | 0.2821  | 0.0085 | 0.1411                    | 0.91           |
| 2   | 759.85 | 1-Hexadecanol                   | 0.0023         | 0.0002 | 0.0023  | 0.0002 | 0.9189                    | 1.01           |
| 3   | 698.10 | 1-Methylhistidine               | 0.0039         | 0.0002 | 0.0034  | 0.0004 | 0.3629                    | 0.88           |
| 4   | 331.20 | 2-Hydroxybutyric acid           | 0.0173         | 0.0017 | 0.0166  | 0.0035 | 0.8604                    | 0.96           |
| 5   | 563.55 | 4-Hydroxyproline                | 0.0817         | 0.0081 | 0.0834  | 0.0077 | 0.8762                    | 1.02           |
| 6   | 727.25 | Allantoin                       | 0.0530         | 0.0033 | 0.0527  | 0.0036 | 0.9612                    | 1.00           |
| 7   | 362.20 | alpha-Aminobutyric acid         | 0.0413         | 0.0028 | 0.0384  | 0.0033 | 0.5165                    | 0.93           |
| 8   | 320.70 | alpha-Ketoisovaleric acid       | 0.0026         | 0.0001 | 0.0027  | 0.0001 | 0.6717                    | 1.02           |
| 9   | 651.00 | Arabitol                        | 0.3659         | 0.0346 | 0.3540  | 0.0291 | 0.7950                    | 0.97           |
| 10  | 632.90 | Asparagine                      | 0.0106         | 0.0011 | 0.0106  | 0.0007 | 0.9624                    | 1.01           |
| 11  | 559.60 | Aspartic acid                   | 0.0057         | 0.0004 | 0.0074  | 0.0008 | 0.0778                    | 1.31           |
| 12  | 422.55 | Caprylic acid                   | 0.0030         | 0.0001 | 0.0035  | 0.0002 | 0.0306                    | 1.19           |
| 13  | 696.70 | Citric acid + Isocitric acid    | 0.5662         | 0.0137 | 0.6447  | 0.0150 | 0.0010                    | 1.14           |
| 14  | 881.45 | Cysteine + Cystine              | 0.0143         | 0.0012 | 0.0121  | 0.0009 | 0.1584                    | 0.85           |
| 15  | 565.65 | Cytosine                        | 0.0043         | 0.0002 | 0.0042  | 0.0003 | 0.7611                    | 0.98           |
| 16  | 860.45 | Elaidic acid                    | 0.0012         | 0.0001 | 0.0014  | 0.0003 | 0.4325                    | 1.21           |
| 17  | 550.25 | Erythritol                      | 0.0053         | 0.0003 | 0.0053  | 0.0002 | 0.8696                    | 0.99           |
| 18  | 721.05 | Fructose                        | 0.0301         | 0.0019 | 0.0382  | 0.0027 | 0.0239                    | 1.27           |
| 19  | 744.25 | Galactosamine                   | 0.0076         | 0.0009 | 0.0085  | 0.0012 | 0.5738                    | 1.12           |
| 20  | 756.45 | Galacturonic acid               | 0.0016         | 0.0001 | 0.0014  | 0.0001 | 0.1140                    | 0.83           |
| 21  | 741.70 | Glucono-1,4-lactone             | 0.0145         | 0.0024 | 0.0184  | 0.0024 | 0.2617                    | 1.27           |
| 22  | 744.75 | Glucuronic acid                 | 0.0011         | 0.0001 | 0.0014  | 0.0002 | 0.1391                    | 1.34           |
| 23  | 608.70 | Glutamic acid                   | 0.0820         | 0.0052 | 0.0908  | 0.0047 | 0.2276                    | 1.11           |
| 24  | 680.05 | Glutamine                       | 0.1034         | 0.0073 | 0.0900  | 0.0066 | 0.1878                    | 0.87           |
| 25  | 456.55 | Glyceric acid                   | 0.0015         | 0.0001 | 0.0017  | 0.0001 | 0.4065                    | 1.10           |
| 26  | 423.20 | Glycerol                        | 0.3011         | 0.0238 | 0.2887  | 0.0161 | 0.6719                    | 0.96           |
| 27  | 446.15 | Glycine                         | 0.3819         | 0.0142 | 0.4088  | 0.0563 | 0.6524                    | 1.07           |
| 28  | 806.95 | Inositol                        | 0.1560         | 0.0137 | 0.1588  | 0.0086 | 0.8626                    | 1.02           |
| 29  | 848.15 | Kynurenine                      | 0.0016         | 0.0002 | 0.0019  | 0.0001 | 0.2754                    | 1.15           |
| 30  | 627.85 | Lauric acid (Dodecanoic acid)   | 0.0048         | 0.0006 | 0.0052  | 0.0008 | 0.6515                    | 1.10           |
| 31  | 741.90 | Lysine                          | 0.9166         | 0.0524 | 1.1914  | 0.0402 | 0.0005                    | 1.30           |
| 32  | 542.75 | Malic acid                      | 0.0022         | 0.0004 | 0.0096  | 0.0018 | 0.0023                    | 4.39           |
| 33  | 723.35 | Mannose                         | 0.2458         | 0.0078 | 0.2270  | 0.0054 | 0.0630                    | 0.92           |
| 34  | 562.75 | Methionine                      | 0.0785         | 0.0056 | 0.0795  | 0.0050 | 0.8915                    | 1.01           |
| 35  | 817.85 | N-alpha-Acetyllysine            | 0.0031         | 0.0012 | 0.0026  | 0.0007 | 0.6897                    | 0.82           |
| 36  | 683.45 | O-Phosphoethanolamine           | 0.0027         | 0.0002 | 0.0034  | 0.0003 | 0.0890                    | 1.23           |
| 37  | 698.25 | Ornithine                       | 0.1973         | 0.0103 | 0.1789  | 0.0121 | 0.2592                    | 0.91           |
| 38  | 335.15 | Oxalic acid                     | 0.0058         | 0.0002 | 0.0067  | 0.0002 | 0.0009                    | 1.16           |
| 39  | 786.65 | Palmitoleic acid                | 0.0029         | 0.0004 | 0.0050  | 0.0014 | 0.1841                    | 1.72           |
| 40  | 616.70 | Phenylalanine                   | 0.0825         | 0.0038 | 0.0945  | 0.0061 | 0.1154                    | 1.15           |
| 41  | 442.55 | Proline                         | 0.0141         | 0.0016 | 0.0134  | 0.0014 | 0.7484                    | 0.95           |
| 42  | 279.25 | Pyruvic acid + Oxaloacetic acid | 0.0292         | 0.0050 | 0.0743  | 0.0156 | 0.0172                    | 2.54           |
| 43  | 656.35 | Rhamnose                        | 0.0018         | 0.0002 | 0.0022  | 0.0002 | 0.2536                    | 1.20           |
| 44  | 653.50 | Ribitol                         | 0.0227         | 0.0022 | 0.0221  | 0.0021 | 0.8458                    | 0.97           |
| 45  | 632.25 | Ribose                          | 0.0044         | 0.0003 | 0.0038  | 0.0008 | 0.4943                    | 0.86           |
| 46  | 632.75 | Ribulose                        | 0.0025         | 0.0003 | 0.0022  | 0.0004 | 0.5369                    | 0.88           |
| 47  | 474.05 | Serine                          | 0.3807         | 0.0282 | 0.3774  | 0.0307 | 0.9383                    | 0.99           |
| 48  | 717.05 | Sorbose                         | 0.0901         | 0.0042 | 0.1098  | 0.0050 | 0.0068                    | 1.22           |
| 49  | 868.55 | Spermidine                      | 0.0016         | 0.0003 | 0.0012  | 0.0001 | 0.2089                    | 0.76           |
| 50  | 450.35 | Succinic acid                   | 0.0152         | 0.0013 | 0.0329  | 0.0042 | 0.0018                    | 2.16           |
| 51  | 715.10 | Tagatose                        | 0.0029         | 0.0002 | 0.0028  | 0.0003 | 0.9117                    | 0.99           |
| 52  | 613.95 | Tartaric acid                   | 0.0011         | 0.0001 | 0.0020  | 0.0002 | 0.0030                    | 1.83           |
| 53  | 635.15 | Taurine                         | 0.0318         | 0.0067 | 0.0187  | 0.0056 | 0.1484                    | 0.59           |
| 54  | 438.90 | Threonine                       | 0.1450         | 0.0100 | 0.1222  | 0.0088 | 0.1027                    | 0.84           |
| 55  | 858.10 | Tryptophan                      | 0.2572         | 0.0176 | 0.2419  | 0.0134 | 0.4986                    | 0.94           |
| 56  | 750.40 | Tyrosine                        | 0.7039         | 0.0229 | 0.6641  | 0.0379 | 0.3829                    | 0.94           |
| 57  | 390.15 | Valine                          | 1.1764         | 0.0527 | 0.8045  | 0.1079 | 0.0076                    | 0.68           |
| 58  | 644.80 | Xylitol                         | 0.0192         | 0.0014 | 0.0190  | 0.0015 | 0.9169                    | 0.99           |
| 59  | 621.70 | Xylose                          | 0.0022         | 0.0003 | 0.0031  | 0.0005 | 0.1473                    | 1.41           |

Content of metabolite was expressed as intensity of each metabolite relative to that of internal standard (2-isopropylmalic acid). Fold change was calculated for each metabolite by dividing the mean value of SDT rat by that of SD rat.

**Supplementary Table 1 (Continued.)** Contents of metabolites in SDT and SD rats (n = 11 each)

| No. | RT     | Metabolite name                 | 12 weeks of age |         |         |         |                           |                |
|-----|--------|---------------------------------|-----------------|---------|---------|---------|---------------------------|----------------|
|     |        |                                 | SD rat          |         | SDT rat |         | t-test<br><i>p</i> -value | Fold<br>change |
|     |        |                                 | Mean            | SE      | Mean    | SE      |                           |                |
| 1   | 712.40 | 1,5-Anhydroglucitol             | 0.1524          | 0.0147  | 0.1235  | 0.0059  | 0.0902                    | 0.81           |
| 2   | 759.85 | 1-Hexadecanol                   | 0.0032          | 0.0002  | 0.0030  | 0.0003  | 0.5259                    | 0.94           |
| 3   | 698.10 | 1-Methylhistidine               | 0.0029          | 0.0004  | 0.0041  | 0.0004  | 0.0403                    | 1.42           |
| 4   | 331.20 | 2-Hydroxybutyric acid           | 0.0056          | 0.0005  | 0.0078  | 0.0015  | 0.1861                    | 1.41           |
| 5   | 563.55 | 4-Hydroxyproline                | 0.0284          | 0.0020  | 0.0272  | 0.0028  | 0.7200                    | 0.96           |
| 6   | 727.25 | Allantoin                       | 0.0640          | 0.0023  | 0.0588  | 0.0019  | 0.1004                    | 0.92           |
| 7   | 362.20 | alpha-Aminobutyric acid         | 0.0152          | 0.0013  | 0.0160  | 0.0011  | 0.6219                    | 1.06           |
| 8   | 320.70 | alpha-Ketoisovaleric acid       | 0.0017          | 0.0002  | 0.0014  | 0.0002  | 0.2598                    | 0.83           |
| 9   | 651.00 | Arabitol                        | 0.1206          | 0.0233  | 0.1449  | 0.0346  | 0.5693                    | 1.20           |
| 10  | 632.90 | Asparagine                      | 0.0080          | 0.0003  | 0.0061  | 0.0004  | 0.0006                    | 0.76           |
| 11  | 559.60 | Aspartic acid                   | 0.0024          | 0.0002  | 0.0032  | 0.0004  | 0.0805                    | 1.34           |
| 12  | 422.55 | Caprylic acid                   | 0.0036          | 0.0001  | 0.0042  | 0.0003  | 0.0561                    | 1.17           |
| 13  | 696.70 | Citric acid + Isocitric acid    | 0.4934          | 0.0175  | 0.4733  | 0.0143  | 0.3836                    | 0.96           |
| 14  | 881.45 | Cysteine + Cystine              | 0.0119          | 0.0011  | 0.0123  | 0.0010  | 0.7821                    | 1.03           |
| 15  | 565.65 | Cytosine                        | 0.0014          | 0.0002  | 0.0011  | 0.0002  | 0.2940                    | 0.79           |
| 16  | 860.45 | Elaidic acid                    | 0.0006          | 0.0001  | 0.0011  | 0.0003  | 0.1104                    | 1.69           |
| 17  | 550.25 | Erythritol                      | 0.0041          | 0.0002  | 0.0035  | 0.0002  | 0.0172                    | 0.85           |
| 18  | 721.05 | Fructose                        | 0.0472          | 0.0043  | 0.0529  | 0.0082  | 0.5494                    | 1.12           |
| 19  | 744.25 | Galactosamine                   | 0.0068          | 0.0012  | 0.0081  | 0.0015  | 0.4888                    | 1.20           |
| 20  | 756.45 | Galacturonic acid               | 0.0012          | 0.0002  | 0.0007  | 0.00003 | 0.0365                    | 0.59           |
| 21  | 741.70 | Glucono-1,4-lactone             | 0.0236          | 0.0008  | 0.0249  | 0.0012  | 0.4054                    | 1.05           |
| 22  | 744.75 | Glucuronic acid                 | 0.0009          | 0.0001  | 0.0008  | 0.0001  | 0.1284                    | 0.84           |
| 23  | 608.70 | Glutamic acid                   | 0.0583          | 0.0039  | 0.0436  | 0.0041  | 0.0164                    | 0.75           |
| 24  | 680.05 | Glutamine                       | 0.1341          | 0.0049  | 0.0975  | 0.0059  | 0.0001                    | 0.73           |
| 25  | 456.55 | Glyceric acid                   | 0.0006          | 0.00004 | 0.0007  | 0.00002 | 0.0509                    | 1.17           |
| 26  | 423.20 | Glycerol                        | 0.2240          | 0.0092  | 0.3302  | 0.0248  | 0.0015                    | 1.47           |
| 27  | 446.15 | Glycine                         | 0.2767          | 0.0104  | 0.2460  | 0.0121  | 0.0687                    | 0.89           |
| 28  | 806.95 | Inositol                        | 0.1073          | 0.0100  | 0.0983  | 0.0044  | 0.4262                    | 0.92           |
| 29  | 848.15 | Kynurenine                      | 0.0015          | 0.0002  | 0.0007  | 0.00005 | 0.0014                    | 0.46           |
| 30  | 627.85 | Lauric acid (Dodecanoic acid)   | 0.0072          | 0.0003  | 0.0084  | 0.0006  | 0.0747                    | 1.18           |
| 31  | 741.90 | Lysine                          | 1.0634          | 0.0467  | 1.1414  | 0.0350  | 0.1981                    | 1.07           |
| 32  | 542.75 | Malic acid                      | 0.0014          | 0.0003  | 0.0016  | 0.0004  | 0.6296                    | 1.18           |
| 33  | 723.35 | Mannose                         | 0.3057          | 0.0090  | 0.2542  | 0.0080  | 0.0004                    | 0.83           |
| 34  | 562.75 | Methionine                      | 0.0573          | 0.0027  | 0.0566  | 0.0041  | 0.8905                    | 0.99           |
| 35  | 817.85 | N-alpha-Acetyllysine            | 0.0028          | 0.0004  | 0.0010  | 0.0002  | 0.0011                    | 0.36           |
| 36  | 683.45 | O-Phosphoethanolamine           | 0.0017          | 0.0001  | 0.0018  | 0.0002  | 0.5253                    | 1.08           |
| 37  | 698.25 | Ornithine                       | 0.1812          | 0.0162  | 0.2330  | 0.0174  | 0.0419                    | 1.29           |
| 38  | 335.15 | Oxalic acid                     | 0.0031          | 0.0006  | 0.0040  | 0.0006  | 0.2542                    | 1.30           |
| 39  | 786.65 | Palmitoleic acid                | 0.0010          | 0.0001  | 0.0025  | 0.0006  | 0.0205                    | 2.61           |
| 40  | 616.70 | Phenylalanine                   | 0.0701          | 0.0026  | 0.0639  | 0.0019  | 0.0652                    | 0.91           |
| 41  | 442.55 | Proline                         | 0.0076          | 0.0006  | 0.0068  | 0.0005  | 0.3133                    | 0.89           |
| 42  | 279.25 | Pyruvic acid + Oxaloacetic acid | 0.0134          | 0.0019  | 0.0223  | 0.0040  | 0.0634                    | 1.66           |
| 43  | 656.35 | Rhamnose                        | 0.0007          | 0.0001  | 0.0007  | 0.0001  | 0.5205                    | 1.11           |
| 44  | 653.50 | Ribitol                         | 0.0067          | 0.0015  | 0.0079  | 0.0021  | 0.6491                    | 1.18           |
| 45  | 632.25 | Ribose                          | 0.0018          | 0.0002  | 0.0022  | 0.0005  | 0.5256                    | 1.20           |
| 46  | 632.75 | Ribulose                        | 0.0030          | 0.0001  | 0.0026  | 0.0001  | 0.0212                    | 0.86           |
| 47  | 474.05 | Serine                          | 0.1850          | 0.0108  | 0.2097  | 0.0156  | 0.2089                    | 1.13           |
| 48  | 717.05 | Sorbose                         | 0.1454          | 0.0101  | 0.1693  | 0.0200  | 0.3027                    | 1.16           |
| 49  | 868.55 | Spermidine                      | 0.0015          | 0.0001  | 0.0012  | 0.0001  | 0.0349                    | 0.81           |
| 50  | 450.35 | Succinic acid                   | 0.0107          | 0.0014  | 0.0132  | 0.0006  | 0.1309                    | 1.23           |
| 51  | 715.10 | Tagatose                        | 0.0016          | 0.0001  | 0.0021  | 0.0003  | 0.1394                    | 1.34           |
| 52  | 613.95 | Tartaric acid                   | 0.0007          | 0.0001  | 0.0009  | 0.0002  | 0.3519                    | 1.29           |
| 53  | 635.15 | Taurine                         | 0.0326          | 0.0086  | 0.0705  | 0.0062  | 0.0021                    | 2.16           |
| 54  | 438.90 | Threonine                       | 0.1311          | 0.0084  | 0.0951  | 0.0053  | 0.0020                    | 0.73           |
| 55  | 858.10 | Tryptophan                      | 0.2554          | 0.0122  | 0.1598  | 0.0101  | <0.0001                   | 0.63           |
| 56  | 750.40 | Tyrosine                        | 0.6188          | 0.0349  | 0.5359  | 0.0178  | 0.0514                    | 0.87           |
| 57  | 390.15 | Valine                          | 1.0593          | 0.0648  | 1.1124  | 0.1218  | 0.7058                    | 1.05           |
| 58  | 644.80 | Xylitol                         | 0.0061          | 0.0015  | 0.0078  | 0.0015  | 0.4415                    | 1.27           |
| 59  | 621.70 | Xylose                          | 0.0017          | 0.0001  | 0.0013  | 0.0002  | 0.1862                    | 0.79           |

Content of metabolite was expressed as intensity of each metabolite relative to that of internal standard (2-isopropylmalic acid). Fold change was calculated for each metabolite by dividing the mean value of SDT rat by that of SD rat.

**Supplementary Table 1 (Continued.)** Contents of metabolites in SDT and SD rats (n = 11 each)

| No. | RT     | Metabolite name                 | 16 weeks of age |         |         |        |                           |                |
|-----|--------|---------------------------------|-----------------|---------|---------|--------|---------------------------|----------------|
|     |        |                                 | SD rat          |         | SDT rat |        | t-test<br><i>p</i> -value | Fold<br>change |
|     |        |                                 | Mean            | SE      | Mean    | SE     |                           |                |
| 1   | 712.40 | 1,5-Anhydroglucitol             | 0.1254          | 0.0143  | 0.0325  | 0.0114 | <0.0001                   | 0.26           |
| 2   | 759.85 | 1-Hexadecanol                   | 0.0031          | 0.0002  | 0.0027  | 0.0003 | 0.3419                    | 0.88           |
| 3   | 698.10 | 1-Methylhistidine               | 0.0016          | 0.0003  | 0.0027  | 0.0005 | 0.0624                    | 1.63           |
| 4   | 331.20 | 2-Hydroxybutyric acid           | 0.0032          | 0.0006  | 0.0035  | 0.0008 | 0.7700                    | 1.10           |
| 5   | 563.55 | 4-Hydroxyproline                | 0.0141          | 0.0010  | 0.0189  | 0.0019 | 0.0400                    | 1.34           |
| 6   | 727.25 | Allantoin                       | 0.0372          | 0.0013  | 0.0493  | 0.0033 | 0.0049                    | 1.32           |
| 7   | 362.20 | alpha-Aminobutyric acid         | 0.0101          | 0.0016  | 0.0115  | 0.0010 | 0.4697                    | 1.14           |
| 8   | 320.70 | alpha-Ketoisovaleric acid       | 0.0021          | 0.0001  | 0.0017  | 0.0002 | 0.0822                    | 0.84           |
| 9   | 651.00 | Arabitol                        | 0.3878          | 0.0278  | 0.3925  | 0.0218 | 0.8936                    | 1.01           |
| 10  | 632.90 | Asparagine                      | 0.0074          | 0.0008  | 0.0076  | 0.0007 | 0.8682                    | 1.02           |
| 11  | 559.60 | Aspartic acid                   | 0.0018          | 0.0002  | 0.0046  | 0.0022 | 0.2440                    | 2.50           |
| 12  | 422.55 | Caprylic acid                   | 0.0029          | 0.0002  | 0.0026  | 0.0002 | 0.1394                    | 0.88           |
| 13  | 696.70 | Citric acid + Isocitric acid    | 0.4443          | 0.0186  | 0.5062  | 0.0311 | 0.1066                    | 1.14           |
| 14  | 881.45 | Cysteine + Cystine              | 0.0090          | 0.0027  | 0.0102  | 0.0012 | 0.6888                    | 1.14           |
| 15  | 565.65 | Cytosine                        | 0.0028          | 0.0002  | 0.0033  | 0.0002 | 0.0846                    | 1.20           |
| 16  | 860.45 | Elaidic acid                    | 0.0007          | 0.0001  | 0.0008  | 0.0002 | 0.6010                    | 1.14           |
| 17  | 550.25 | Erythritol                      | 0.0042          | 0.0002  | 0.0045  | 0.0002 | 0.2686                    | 1.08           |
| 18  | 721.05 | Fructose                        | 0.1189          | 0.0301  | 0.1174  | 0.0193 | 0.9667                    | 0.99           |
| 19  | 744.25 | Galactosamine                   | 0.0107          | 0.0023  | 0.0123  | 0.0020 | 0.6129                    | 1.15           |
| 20  | 756.45 | Galacturonic acid               | 0.0011          | 0.0001  | 0.0010  | 0.0001 | 0.3467                    | 0.88           |
| 21  | 741.70 | Glucono-1,4-lactone             | 0.0145          | 0.0032  | 0.0220  | 0.0029 | 0.0999                    | 1.52           |
| 22  | 744.75 | Glucuronic acid                 | 0.0007          | 0.0001  | 0.0008  | 0.0001 | 0.1840                    | 1.27           |
| 23  | 608.70 | Glutamic acid                   | 0.0433          | 0.0045  | 0.0510  | 0.0050 | 0.2653                    | 1.18           |
| 24  | 680.05 | Glutamine                       | 0.0580          | 0.0067  | 0.0590  | 0.0061 | 0.9153                    | 1.02           |
| 25  | 456.55 | Glyceric acid                   | 0.0014          | 0.0003  | 0.0013  | 0.0002 | 0.8597                    | 0.96           |
| 26  | 423.20 | Glycerol                        | 0.2365          | 0.0116  | 0.2176  | 0.0249 | 0.5019                    | 0.92           |
| 27  | 446.15 | Glycine                         | 0.2526          | 0.0112  | 0.2823  | 0.0105 | 0.0669                    | 1.12           |
| 28  | 806.95 | Inositol                        | 0.0975          | 0.0042  | 0.1206  | 0.0144 | 0.1501                    | 1.24           |
| 29  | 848.15 | Kynurenine                      | 0.0006          | 0.00004 | 0.0009  | 0.0001 | 0.0469                    | 1.50           |
| 30  | 627.85 | Lauric acid (Dodecanoic acid)   | 0.0087          | 0.0004  | 0.0086  | 0.0004 | 0.9038                    | 0.99           |
| 31  | 741.90 | Lysine                          | 0.7120          | 0.0867  | 1.0161  | 0.0611 | 0.0102                    | 1.43           |
| 32  | 542.75 | Malic acid                      | 0.0021          | 0.0004  | 0.0033  | 0.0007 | 0.1881                    | 1.55           |
| 33  | 723.35 | Mannose                         | 0.3006          | 0.0148  | 0.2755  | 0.0091 | 0.1663                    | 0.92           |
| 34  | 562.75 | Methionine                      | 0.0439          | 0.0035  | 0.0498  | 0.0046 | 0.3153                    | 1.14           |
| 35  | 817.85 | N-alpha-Acetyllysine            | 0.0020          | 0.0007  | 0.0007  | 0.0001 | 0.1090                    | 0.34           |
| 36  | 683.45 | O-Phosphoethanolamine           | 0.0013          | 0.0001  | 0.0022  | 0.0003 | 0.0232                    | 1.63           |
| 37  | 698.25 | Ornithine                       | 0.0958          | 0.0098  | 0.1701  | 0.0182 | 0.0026                    | 1.78           |
| 38  | 335.15 | Oxalic acid                     | 0.0043          | 0.0004  | 0.0054  | 0.0003 | 0.0494                    | 1.25           |
| 39  | 786.65 | Palmitoleic acid                | 0.0013          | 0.0003  | 0.0023  | 0.0013 | 0.4626                    | 1.78           |
| 40  | 616.70 | Phenylalanine                   | 0.0604          | 0.0033  | 0.0716  | 0.0059 | 0.1153                    | 1.19           |
| 41  | 442.55 | Proline                         | 0.0060          | 0.0004  | 0.0065  | 0.0007 | 0.5802                    | 1.07           |
| 42  | 279.25 | Pyruvic acid + Oxaloacetic acid | 0.0073          | 0.0010  | 0.0163  | 0.0029 | 0.0116                    | 2.23           |
| 43  | 656.35 | Rhamnose                        | 0.0007          | 0.0001  | 0.0011  | 0.0001 | 0.0237                    | 1.54           |
| 44  | 653.50 | Ribitol                         | 0.0265          | 0.0022  | 0.0266  | 0.0018 | 0.9786                    | 1.00           |
| 45  | 632.25 | Ribose                          | 0.0030          | 0.0003  | 0.0030  | 0.0004 | 0.9141                    | 0.98           |
| 46  | 632.75 | Ribulose                        | 0.0023          | 0.0003  | 0.0026  | 0.0002 | 0.3985                    | 1.15           |
| 47  | 474.05 | Serine                          | 0.1313          | 0.0098  | 0.1930  | 0.0173 | 0.0069                    | 1.47           |
| 48  | 717.05 | Sorbose                         | 0.2835          | 0.0600  | 0.3005  | 0.0383 | 0.8147                    | 1.06           |
| 49  | 868.55 | Spermidine                      | 0.0012          | 0.0001  | 0.0011  | 0.0001 | 0.2233                    | 0.90           |
| 50  | 450.35 | Succinic acid                   | 0.0150          | 0.0012  | 0.0273  | 0.0056 | 0.0541                    | 1.82           |
| 51  | 715.10 | Tagatose                        | 0.0019          | 0.0001  | 0.0026  | 0.0004 | 0.1370                    | 1.39           |
| 52  | 613.95 | Tartaric acid                   | 0.0011          | 0.0001  | 0.0010  | 0.0001 | 0.6531                    | 0.93           |
| 53  | 635.15 | Taurine                         | 0.0273          | 0.0090  | 0.0635  | 0.0141 | 0.0450                    | 2.33           |
| 54  | 438.90 | Threonine                       | 0.1600          | 0.0136  | 0.1411  | 0.0135 | 0.3360                    | 0.88           |
| 55  | 858.10 | Tryptophan                      | 0.2816          | 0.0212  | 0.2212  | 0.0156 | 0.0335                    | 0.79           |
| 56  | 750.40 | Tyrosine                        | 0.5426          | 0.0299  | 0.5089  | 0.0282 | 0.4219                    | 0.94           |
| 57  | 390.15 | Valine                          | 0.6991          | 0.0307  | 0.7433  | 0.0592 | 0.5173                    | 1.06           |
| 58  | 644.80 | Xylitol                         | 0.0154          | 0.0017  | 0.0172  | 0.0010 | 0.3825                    | 1.12           |
| 59  | 621.70 | Xylose                          | 0.0026          | 0.0004  | 0.0019  | 0.0004 | 0.2645                    | 0.74           |

Content of metabolite was expressed as intensity of each metabolite relative to that of internal standard (2-isopropylmalic acid). Fold change was calculated for each metabolite by dividing the mean value of SDT rat by that of SD rat.

**Supplementary Table 1 (Continued.)** Contents of metabolites in SDT and SD rats (n = 11 each)

| No. | RT     | Metabolite name                 | 20 weeks of age |         |         |         |                           |                |
|-----|--------|---------------------------------|-----------------|---------|---------|---------|---------------------------|----------------|
|     |        |                                 | SD rat          |         | SDT rat |         | t-test<br><i>p</i> -value | Fold<br>change |
|     |        |                                 | Mean            | SE      | Mean    | SE      |                           |                |
| 1   | 712.40 | 1,5-Anhydroglucitol             | 0.0440          | 0.0072  | 0.0008  | 0.00003 | 0.0001                    | 0.02           |
| 2   | 759.85 | 1-Hexadecanol                   | 0.0039          | 0.0002  | 0.0035  | 0.0003  | 0.3222                    | 0.90           |
| 3   | 698.10 | 1-Methylhistidine               | 0.0009          | 0.0002  | 0.0011  | 0.0003  | 0.5466                    | 1.22           |
| 4   | 331.20 | 2-Hydroxybutyric acid           | 0.0031          | 0.0006  | 0.0033  | 0.0006  | 0.8485                    | 1.05           |
| 5   | 563.55 | 4-Hydroxyproline                | 0.0152          | 0.0012  | 0.0208  | 0.0014  | 0.0065                    | 1.37           |
| 6   | 727.25 | Allantoin                       | 0.0547          | 0.0014  | 0.0597  | 0.0036  | 0.2240                    | 1.09           |
| 7   | 362.20 | alpha-Aminobutyric acid         | 0.0108          | 0.0020  | 0.0082  | 0.0006  | 0.2268                    | 0.76           |
| 8   | 320.70 | alpha-Ketoisovaleric acid       | 0.0012          | 0.0002  | 0.0014  | 0.0002  | 0.3368                    | 1.23           |
| 9   | 651.00 | Arabitol                        | 0.6791          | 0.0403  | 0.6671  | 0.0207  | 0.7938                    | 0.98           |
| 10  | 632.90 | Asparagine                      | 0.0072          | 0.0005  | 0.0056  | 0.0003  | 0.0159                    | 0.79           |
| 11  | 559.60 | Aspartic acid                   | 0.0017          | 0.0001  | 0.0021  | 0.0001  | 0.0481                    | 1.23           |
| 12  | 422.55 | Caprylic acid                   | 0.0037          | 0.0002  | 0.0030  | 0.0002  | 0.0245                    | 0.80           |
| 13  | 696.70 | Citric acid + Isocitric acid    | 0.4278          | 0.0215  | 0.4248  | 0.0116  | 0.9050                    | 0.99           |
| 14  | 881.45 | Cysteine + Cystine              | 0.0072          | 0.0007  | 0.0089  | 0.0013  | 0.2612                    | 1.23           |
| 15  | 565.65 | Cytosine                        | 0.0016          | 0.0002  | 0.0016  | 0.0004  | 0.8750                    | 0.96           |
| 16  | 860.45 | Elaidic acid                    | 0.0007          | 0.00004 | 0.0011  | 0.0001  | 0.0098                    | 1.65           |
| 17  | 550.25 | Erythritol                      | 0.0047          | 0.0002  | 0.0052  | 0.0001  | 0.0518                    | 1.10           |
| 18  | 721.05 | Fructose                        | 0.1580          | 0.0246  | 0.2474  | 0.0531  | 0.1490                    | 1.57           |
| 19  | 744.25 | Galactosamine                   | 0.0083          | 0.0016  | 0.0304  | 0.0049  | 0.0010                    | 3.67           |
| 20  | 756.45 | Galacturonic acid               | 0.0009          | 0.0001  | 0.0010  | 0.0001  | 0.6699                    | 1.05           |
| 21  | 741.70 | Glucono-1,4-lactone             | 0.0185          | 0.0030  | 0.0191  | 0.0051  | 0.9212                    | 1.03           |
| 22  | 744.75 | Glucuronic acid                 | 0.0006          | 0.00004 | 0.0010  | 0.0002  | 0.0456                    | 1.59           |
| 23  | 608.70 | Glutamic acid                   | 0.0411          | 0.0032  | 0.0318  | 0.0027  | 0.0385                    | 0.77           |
| 24  | 680.05 | Glutamine                       | 0.1349          | 0.0065  | 0.1038  | 0.0054  | 0.0015                    | 0.77           |
| 25  | 456.55 | Glyceric acid                   | 0.0010          | 0.0001  | 0.0014  | 0.0002  | 0.0837                    | 1.44           |
| 26  | 423.20 | Glycerol                        | 0.2596          | 0.0110  | 0.2281  | 0.0151  | 0.1090                    | 0.88           |
| 27  | 446.15 | Glycine                         | 0.2204          | 0.0100  | 0.2305  | 0.0079  | 0.4345                    | 1.05           |
| 28  | 806.95 | Inositol                        | 0.0843          | 0.0052  | 0.0927  | 0.0069  | 0.3427                    | 1.10           |
| 29  | 848.15 | Kynurenine                      | 0.0007          | 0.00003 | 0.0006  | 0.0001  | 0.6226                    | 0.94           |
| 30  | 627.85 | Lauric acid (Dodecanoic acid)   | 0.0068          | 0.0005  | 0.0071  | 0.0004  | 0.6131                    | 1.05           |
| 31  | 741.90 | Lysine                          | 0.6031          | 0.0290  | 0.8646  | 0.0879  | 0.0151                    | 1.43           |
| 32  | 542.75 | Malic acid                      | 0.0015          | 0.0003  | 0.0041  | 0.0011  | 0.0451                    | 2.73           |
| 33  | 723.35 | Mannose                         | 0.2754          | 0.0110  | 0.4093  | 0.0491  | 0.0222                    | 1.49           |
| 34  | 562.75 | Methionine                      | 0.0505          | 0.0018  | 0.0369  | 0.0029  | 0.0011                    | 0.73           |
| 35  | 817.85 | N-alpha-Acetyllysine            | 0.0011          | 0.0002  | 0.0016  | 0.0005  | 0.3421                    | 1.46           |
| 36  | 683.45 | O-Phosphoethanolamine           | 0.0011          | 0.0001  | 0.0012  | 0.0001  | 0.6886                    | 1.05           |
| 37  | 698.25 | Ornithine                       | 0.0816          | 0.0092  | 0.0900  | 0.0101  | 0.5436                    | 1.10           |
| 38  | 335.15 | Oxalic acid                     | 0.0020          | 0.0004  | 0.0026  | 0.0004  | 0.3336                    | 1.28           |
| 39  | 786.65 | Palmitoleic acid                | 0.0009          | 0.0001  | 0.0010  | 0.0002  | 0.6317                    | 1.11           |
| 40  | 616.70 | Phenylalanine                   | 0.0642          | 0.0030  | 0.0480  | 0.0029  | 0.0009                    | 0.75           |
| 41  | 442.55 | Proline                         | 0.0082          | 0.0004  | 0.0065  | 0.0005  | 0.0097                    | 0.79           |
| 42  | 279.25 | Pyruvic acid + Oxaloacetic acid | 0.0034          | 0.0004  | 0.0075  | 0.0007  | 0.0001                    | 2.19           |
| 43  | 656.35 | Rhamnose                        | 0.0009          | 0.0001  | 0.0010  | 0.0001  | 0.4145                    | 1.11           |
| 44  | 653.50 | Ribitol                         | 0.0454          | 0.0031  | 0.0459  | 0.0018  | 0.8926                    | 1.01           |
| 45  | 632.25 | Ribose                          | 0.0031          | 0.0005  | 0.0033  | 0.0005  | 0.7213                    | 1.08           |
| 46  | 632.75 | Ribulose                        | 0.0026          | 0.0003  | 0.0017  | 0.0003  | 0.0164                    | 0.63           |
| 47  | 474.05 | Serine                          | 0.1604          | 0.0080  | 0.1979  | 0.0192  | 0.0940                    | 1.23           |
| 48  | 717.05 | Sorbose                         | 0.3964          | 0.0469  | 0.5417  | 0.0856  | 0.1566                    | 1.37           |
| 49  | 868.55 | Spermidine                      | 0.0013          | 0.0001  | 0.0013  | 0.0001  | 0.5935                    | 1.03           |
| 50  | 450.35 | Succinic acid                   | 0.0239          | 0.0039  | 0.0245  | 0.0055  | 0.9267                    | 1.03           |
| 51  | 715.10 | Tagatose                        | 0.0023          | 0.0001  | 0.0044  | 0.0007  | 0.0127                    | 1.92           |
| 52  | 613.95 | Tartaric acid                   | 0.0010          | 0.0001  | 0.0009  | 0.0001  | 0.5336                    | 0.93           |
| 53  | 635.15 | Taurine                         | 0.0570          | 0.0022  | 0.0362  | 0.0068  | 0.0128                    | 0.63           |
| 54  | 438.90 | Threonine                       | 0.0916          | 0.0055  | 0.0674  | 0.0045  | 0.0029                    | 0.74           |
| 55  | 858.10 | Tryptophan                      | 0.2780          | 0.0215  | 0.1907  | 0.0108  | 0.0025                    | 0.69           |
| 56  | 750.40 | Tyrosine                        | 0.4273          | 0.0230  | 0.5024  | 0.0350  | 0.0908                    | 1.18           |
| 57  | 390.15 | Valine                          | 0.6797          | 0.0413  | 0.5515  | 0.0377  | 0.0329                    | 0.81           |
| 58  | 644.80 | Xylitol                         | 0.0228          | 0.0012  | 0.0240  | 0.0009  | 0.4227                    | 1.05           |
| 59  | 621.70 | Xylose                          | 0.0025          | 0.0003  | 0.0031  | 0.0005  | 0.3154                    | 1.24           |

Content of metabolite was expressed as intensity of each metabolite relative to that of internal standard (2-isopropylmalic acid). Fold change was calculated for each metabolite by dividing the mean value of SDT rat by that of SD rat.

**Supplementary Table 1 (Continued.)** Contents of metabolites in SDT and SD rats (n = 11 each)

| No. | RT     | Metabolite name                 | 24 weeks of age |        |         |         |                           |                |
|-----|--------|---------------------------------|-----------------|--------|---------|---------|---------------------------|----------------|
|     |        |                                 | SD rat          |        | SDT rat |         | t-test<br><i>p</i> -value | Fold<br>change |
|     |        |                                 | Mean            | SE     | Mean    | SE      |                           |                |
| 1   | 712.40 | 1,5-Anhydroglucitol             | 0.0373          | 0.0051 | 0.0022  | 0.0007  | 0.0000                    | 0.06           |
| 2   | 759.85 | 1-Hexadecanol                   | 0.0032          | 0.0002 | 0.0026  | 0.0005  | 0.2441                    | 0.80           |
| 3   | 698.10 | 1-Methylhistidine               | 0.0018          | 0.0004 | 0.0004  | 0.00003 | 0.0076                    | 0.23           |
| 4   | 331.20 | 2-Hydroxybutyric acid           | 0.0055          | 0.0009 | 0.0043  | 0.0008  | 0.3553                    | 0.78           |
| 5   | 563.55 | 4-Hydroxyproline                | 0.0159          | 0.0013 | 0.0182  | 0.0009  | 0.1674                    | 1.15           |
| 6   | 727.25 | Allantoin                       | 0.0510          | 0.0020 | 0.0517  | 0.0024  | 0.8317                    | 1.01           |
| 7   | 362.20 | alpha-Aminobutyric acid         | 0.0148          | 0.0036 | 0.0069  | 0.0003  | 0.0540                    | 0.47           |
| 8   | 320.70 | alpha-Ketoisovaleric acid       | 0.0020          | 0.0001 | 0.0012  | 0.0001  | <0.0001                   | 0.60           |
| 9   | 651.00 | Arabitol                        | 0.9218          | 0.0536 | 0.7398  | 0.0375  | 0.0130                    | 0.80           |
| 10  | 632.90 | Asparagine                      | 0.0073          | 0.0005 | 0.0053  | 0.0004  | 0.0068                    | 0.72           |
| 11  | 559.60 | Aspartic acid                   | 0.0031          | 0.0003 | 0.0023  | 0.0003  | 0.0741                    | 0.74           |
| 12  | 422.55 | Caprylic acid                   | 0.0032          | 0.0002 | 0.0019  | 0.0001  | <0.0001                   | 0.60           |
| 13  | 696.70 | Citric acid + Isocitric acid    | 0.4763          | 0.0236 | 0.3633  | 0.0172  | 0.0013                    | 0.76           |
| 14  | 881.45 | Cysteine + Cystine              | 0.0102          | 0.0011 | 0.0144  | 0.0017  | 0.0616                    | 1.40           |
| 15  | 565.65 | Cytosine                        | 0.0037          | 0.0002 | 0.0019  | 0.0002  | <0.0001                   | 0.50           |
| 16  | 860.45 | Elaidic acid                    | 0.0007          | 0.0000 | 0.0017  | 0.0002  | 0.0051                    | 2.44           |
| 17  | 550.25 | Erythritol                      | 0.0057          | 0.0003 | 0.0059  | 0.0001  | 0.4970                    | 1.03           |
| 18  | 721.05 | Fructose                        | 0.1780          | 0.0289 | 0.7112  | 0.1271  | 0.0037                    | 4.00           |
| 19  | 744.25 | Galactosamine                   | 0.0180          | 0.0030 | 0.0436  | 0.0092  | 0.0283                    | 2.43           |
| 20  | 756.45 | Galacturonic acid               | 0.0011          | 0.0001 | 0.0015  | 0.0002  | 0.1081                    | 1.37           |
| 21  | 741.70 | Glucono-1,4-lactone             | 0.0160          | 0.0039 | 0.0148  | 0.0055  | 0.8568                    | 0.92           |
| 22  | 744.75 | Glucuronic acid                 | 0.0008          | 0.0001 | 0.0018  | 0.0002  | 0.0030                    | 2.20           |
| 23  | 608.70 | Glutamic acid                   | 0.0607          | 0.0052 | 0.0174  | 0.0009  | <0.0001                   | 0.29           |
| 24  | 680.05 | Glutamine                       | 0.0979          | 0.0063 | 0.0618  | 0.0047  | 0.0003                    | 0.63           |
| 25  | 456.55 | Glyceric acid                   | 0.0012          | 0.0002 | 0.0042  | 0.0006  | 0.0014                    | 3.37           |
| 26  | 423.20 | Glycerol                        | 0.2563          | 0.0103 | 0.2226  | 0.0117  | 0.0466                    | 0.87           |
| 27  | 446.15 | Glycine                         | 0.2421          | 0.0072 | 0.2282  | 0.0080  | 0.2161                    | 0.94           |
| 28  | 806.95 | Inositol                        | 0.0875          | 0.0037 | 0.1281  | 0.0098  | 0.0038                    | 1.46           |
| 29  | 848.15 | Kynurenine                      | 0.0008          | 0.0001 | 0.0004  | 0.00003 | 0.0051                    | 0.55           |
| 30  | 627.85 | Lauric acid (Dodecanoic acid)   | 0.0083          | 0.0004 | 0.0063  | 0.0002  | 0.0003                    | 0.76           |
| 31  | 741.90 | Lysine                          | 0.5944          | 0.0547 | 0.5267  | 0.0751  | 0.4781                    | 0.89           |
| 32  | 542.75 | Malic acid                      | 0.0020          | 0.0005 | 0.0074  | 0.0016  | 0.0100                    | 3.73           |
| 33  | 723.35 | Mannose                         | 0.2833          | 0.0128 | 0.5769  | 0.0532  | 0.0007                    | 2.04           |
| 34  | 562.75 | Methionine                      | 0.0543          | 0.0024 | 0.0398  | 0.0014  | 0.0001                    | 0.73           |
| 35  | 817.85 | N-alpha-Acetyllysine            | 0.0007          | 0.0001 | 0.0007  | 0.0001  | 0.6793                    | 0.91           |
| 36  | 683.45 | O-Phosphoethanolamine           | 0.0017          | 0.0001 | 0.0010  | 0.0001  | 0.0007                    | 0.57           |
| 37  | 698.25 | Ornithine                       | 0.1092          | 0.0167 | 0.0538  | 0.0081  | 0.0098                    | 0.49           |
| 38  | 335.15 | Oxalic acid                     | 0.0025          | 0.0006 | 0.0034  | 0.0004  | 0.2072                    | 1.36           |
| 39  | 786.65 | Palmitoleic acid                | 0.0011          | 0.0001 | 0.0012  | 0.0002  | 0.8201                    | 1.06           |
| 40  | 616.70 | Phenylalanine                   | 0.0725          | 0.0034 | 0.0503  | 0.0028  | 0.0001                    | 0.69           |
| 41  | 442.55 | Proline                         | 0.0085          | 0.0006 | 0.0069  | 0.0004  | 0.0483                    | 0.81           |
| 42  | 279.25 | Pyruvic acid + Oxaloacetic acid | 0.0037          | 0.0005 | 0.0022  | 0.0003  | 0.0238                    | 0.61           |
| 43  | 656.35 | Rhamnose                        | 0.0018          | 0.0001 | 0.0015  | 0.0002  | 0.0963                    | 0.81           |
| 44  | 653.50 | Ribitol                         | 0.0676          | 0.0047 | 0.0561  | 0.0030  | 0.0546                    | 0.83           |
| 45  | 632.25 | Ribose                          | 0.0059          | 0.0004 | 0.0063  | 0.0006  | 0.5970                    | 1.07           |
| 46  | 632.75 | Ribulose                        | 0.0026          | 0.0002 | 0.0012  | 0.0003  | 0.0011                    | 0.46           |
| 47  | 474.05 | Serine                          | 0.1746          | 0.0088 | 0.1944  | 0.0136  | 0.2438                    | 1.11           |
| 48  | 717.05 | Sorbose                         | 0.4497          | 0.0547 | 1.2842  | 0.1962  | 0.0034                    | 2.86           |
| 49  | 868.55 | Spermidine                      | 0.0011          | 0.0001 | 0.0012  | 0.0001  | 0.8086                    | 1.03           |
| 50  | 450.35 | Succinic acid                   | 0.0363          | 0.0048 | 0.0478  | 0.0092  | 0.2930                    | 1.32           |
| 51  | 715.10 | Tagatose                        | 0.0025          | 0.0001 | 0.0085  | 0.0016  | 0.0062                    | 3.44           |
| 52  | 613.95 | Tartaric acid                   | 0.0010          | 0.0001 | 0.0011  | 0.0001  | 0.6962                    | 1.06           |
| 53  | 635.15 | Taurine                         | 0.0692          | 0.0044 | 0.0418  | 0.0061  | 0.0029                    | 0.60           |
| 54  | 438.90 | Threonine                       | 0.1227          | 0.0055 | 0.0782  | 0.0046  | <0.0001                   | 0.64           |
| 55  | 858.10 | Tryptophan                      | 0.3206          | 0.0183 | 0.2186  | 0.0097  | 0.0002                    | 0.68           |
| 56  | 750.40 | Tyrosine                        | 0.4801          | 0.0286 | 0.6726  | 0.0350  | 0.0007                    | 1.40           |
| 57  | 390.15 | Valine                          | 0.9288          | 0.0858 | 0.6206  | 0.0278  | 0.0051                    | 0.67           |
| 58  | 644.80 | Xylitol                         | 0.0301          | 0.0018 | 0.0243  | 0.0010  | 0.0155                    | 0.81           |
| 59  | 621.70 | Xylose                          | 0.0043          | 0.0005 | 0.0050  | 0.0004  | 0.2462                    | 1.17           |

Content of metabolite was expressed as intensity of each metabolite relative to that of internal standard (2-isopropylmalic acid). Fold change was calculated for each metabolite by dividing the mean value of SDT rat by that of SD rat.

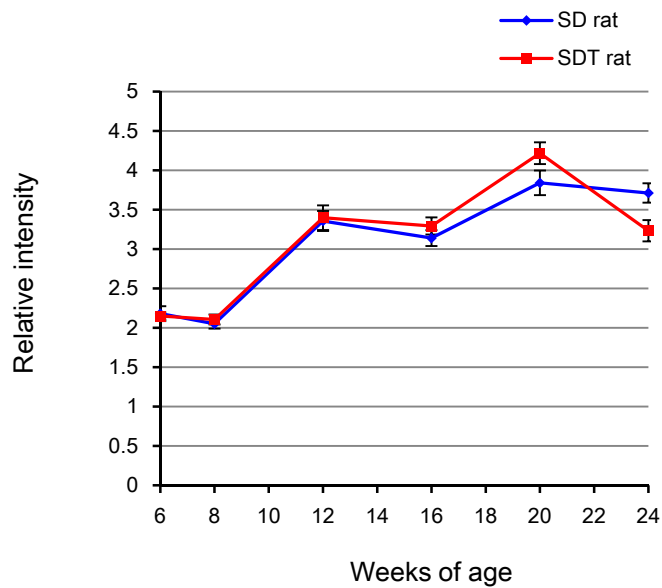

**Supplementary Fig. 1**

Glucose levels measured by GC-MS.

The data are expressed as means  $\pm$  SEM.

Since the amount of glucose exceeded the upper limit of quantification, the difference in glucose levels between diabetic SDT and control SD rats could not be evaluated. A comparison between a GC-MS and a glucose meter with respect to sensitivity and repeatability was also provided:

GCMS-QP2010 Ultra

C.V.: < 5%

Sensitivity (See Tsugawa et al. 2011)

ANTSENSE III (portable glucose meter)

C.V.: < 5%

Lower limit: 10 mg/dl

Upper limit: 1,000 mg/dl







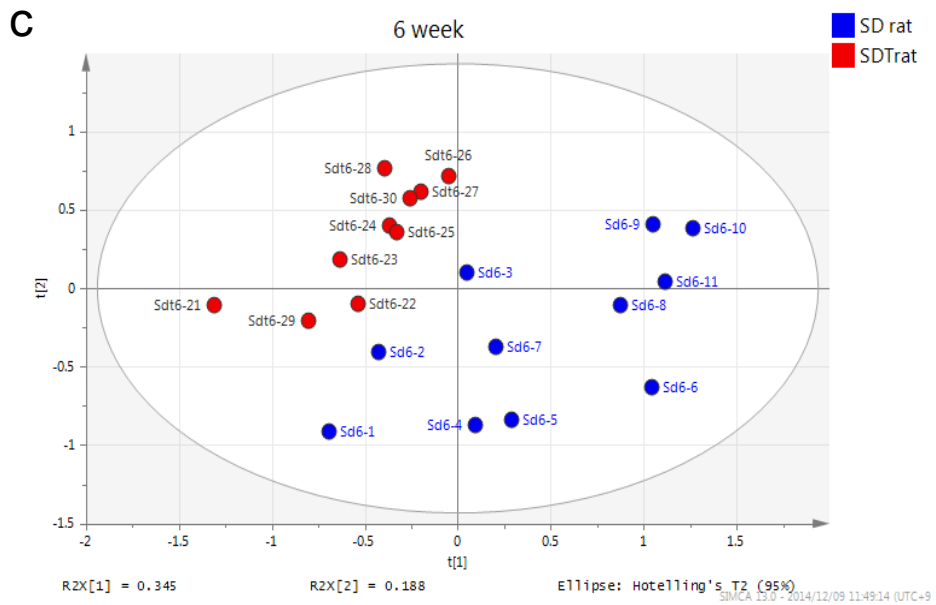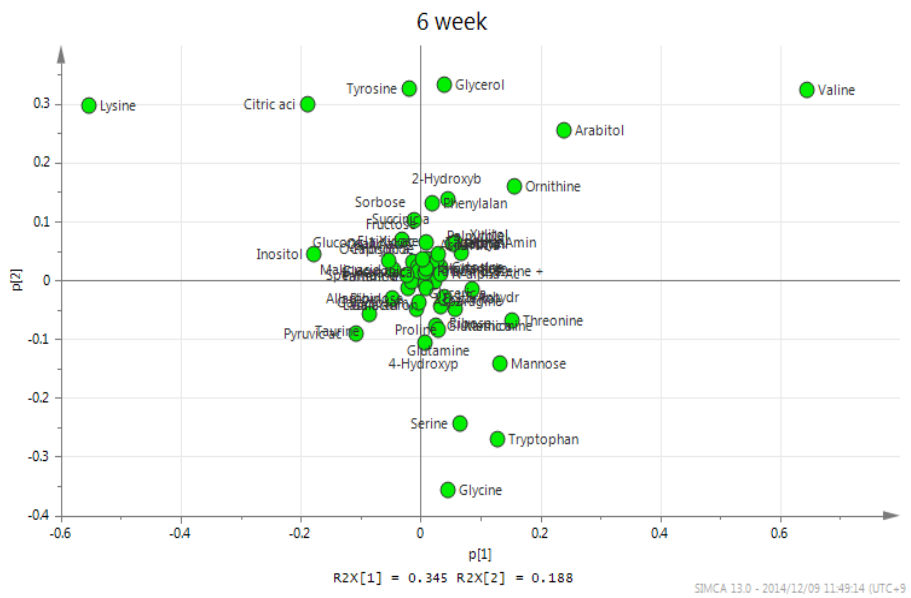

**Supplementary Fig. 2 (Continued.)**

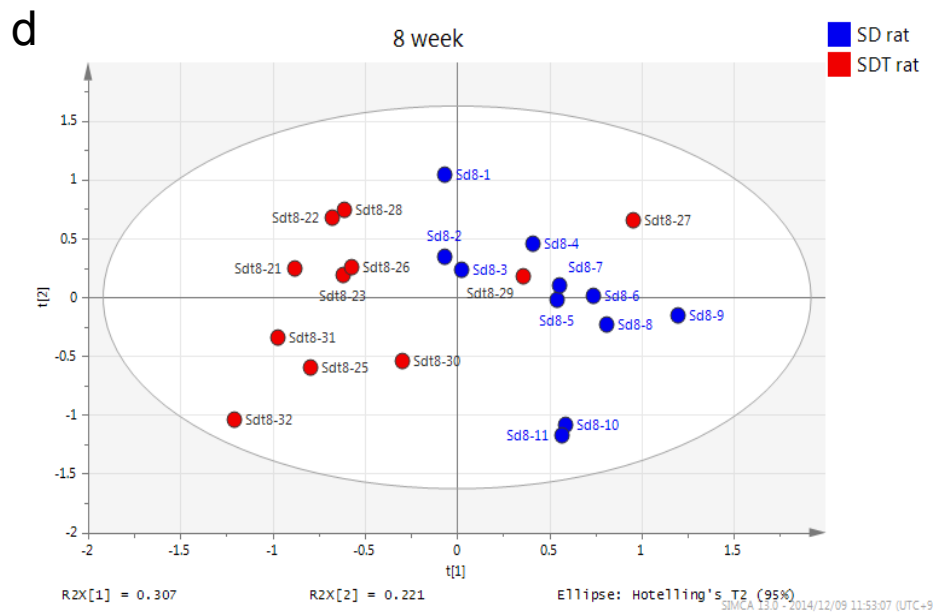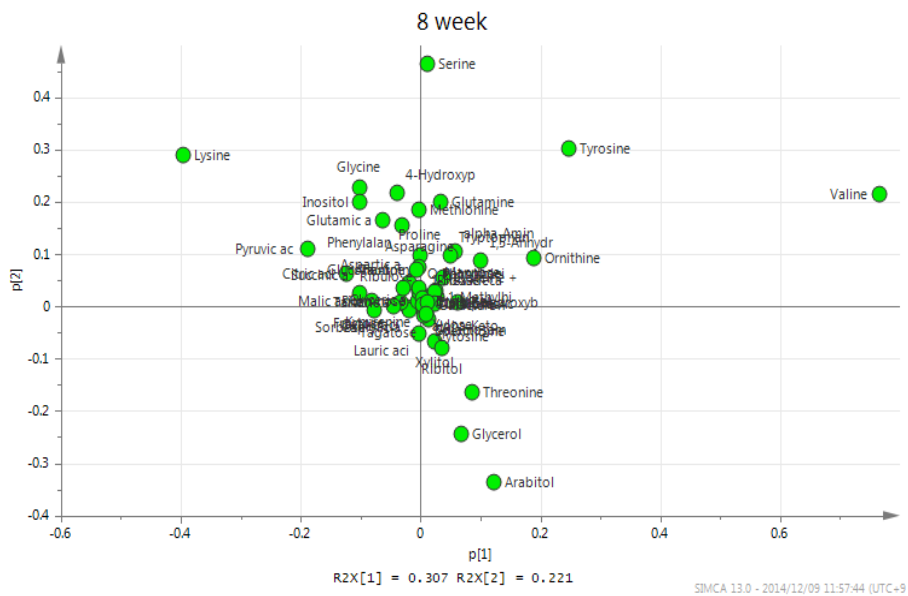

**Supplementary Fig. 2 (Continued.)**

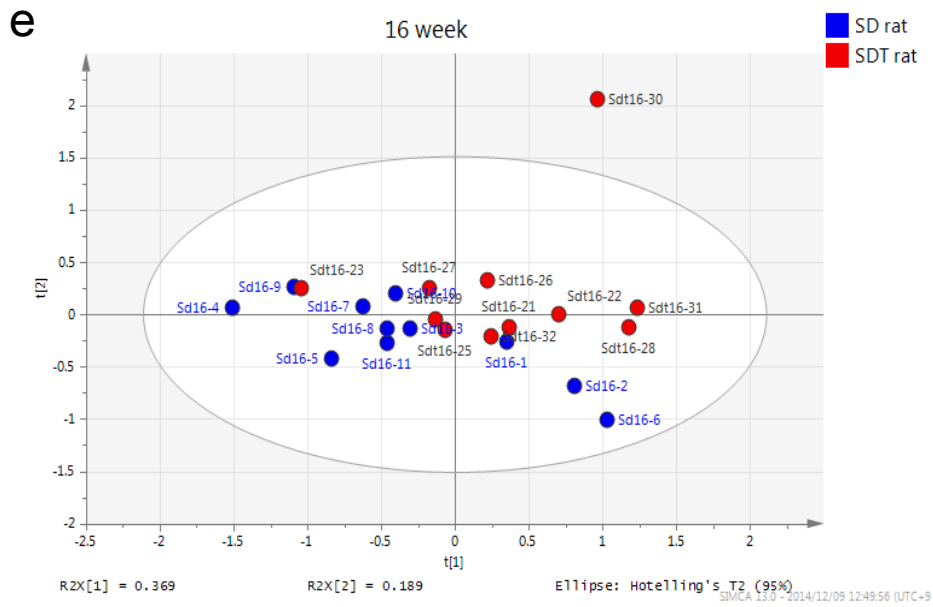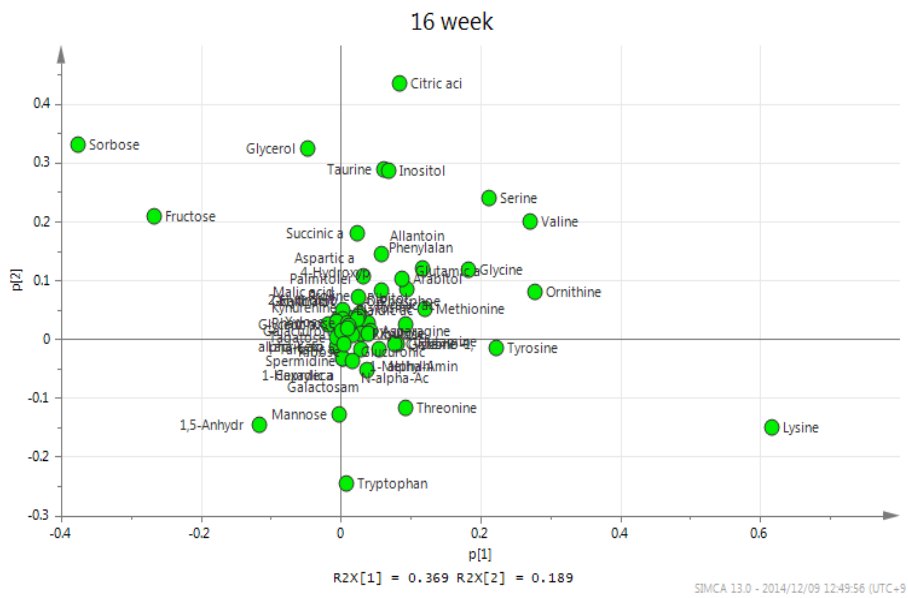

**Supplementary Fig. 2 (Continued.)**





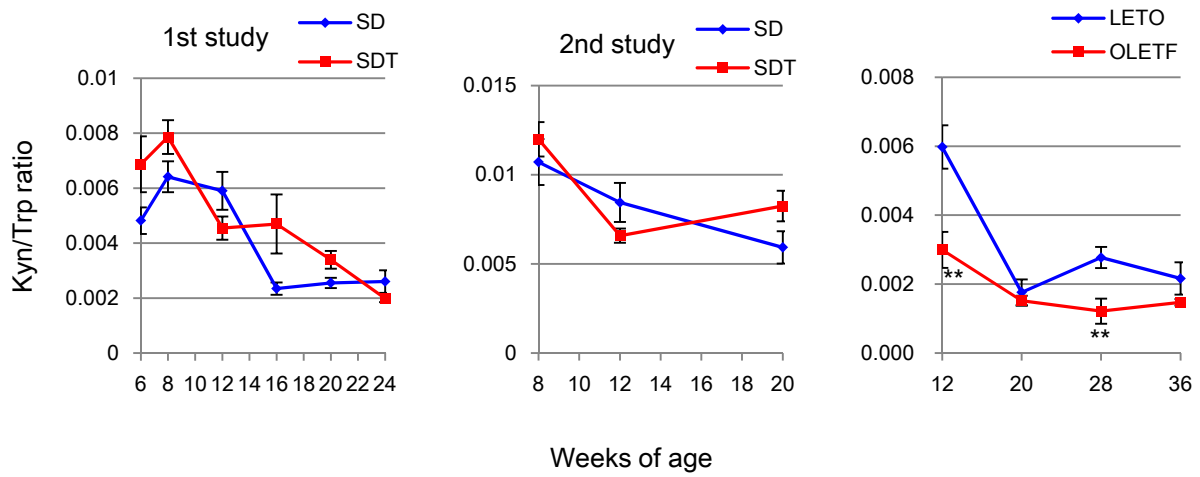

### Supplementary Fig. 3

Kynurenine/tryptophan ratio.

The data are expressed as means  $\pm$  SEM. Welch's t test was used for evaluation of statistical significance. \*\*  $p < 0.01$
